# Supplementary material
Source: HighWire-hosted journal article supplement (https://www.cfp.ca/highwire/filestream/35490/field_highwire_adjunct_files/3/341_T2DM_CVOTS.pdf)
Supplement: 341_T2DM_CVOTS.pdf [file 341_T2DM_CVOTS.pdf]

|                                                                                                                                                                                                                                                                                                                                                                   | Trial Characteristics                                                                                                                                                                                                                                                                                                                   | Population Baseline                                                                                      | Glycemic Intervention (added to usual T2DM care)                                                                               | Final A1c                                                                         | Macrovascular Outcome Summary                                                                   |                                                                                             |                                                                       | Summary of RCT Evidence<br>Health Canada Approvals, Renal Outcomes                                                                                                                                                                                                                                                                                                                                                                                                                                                                                                                                                                                                                                                                                                                                                                                                                                                                                                                                                                                                                                                                             |             |        |            |               |   |             |               |             |   |
|-------------------------------------------------------------------------------------------------------------------------------------------------------------------------------------------------------------------------------------------------------------------------------------------------------------------------------------------------------------------|-----------------------------------------------------------------------------------------------------------------------------------------------------------------------------------------------------------------------------------------------------------------------------------------------------------------------------------------|----------------------------------------------------------------------------------------------------------|--------------------------------------------------------------------------------------------------------------------------------|-----------------------------------------------------------------------------------|-------------------------------------------------------------------------------------------------|---------------------------------------------------------------------------------------------|-----------------------------------------------------------------------|------------------------------------------------------------------------------------------------------------------------------------------------------------------------------------------------------------------------------------------------------------------------------------------------------------------------------------------------------------------------------------------------------------------------------------------------------------------------------------------------------------------------------------------------------------------------------------------------------------------------------------------------------------------------------------------------------------------------------------------------------------------------------------------------------------------------------------------------------------------------------------------------------------------------------------------------------------------------------------------------------------------------------------------------------------------------------------------------------------------------------------------------|-------------|--------|------------|---------------|---|-------------|---------------|-------------|---|
|                                                                                                                                                                                                                                                                                                                                                                   |                                                                                                                                                                                                                                                                                                                                         |                                                                                                          |                                                                                                                                |                                                                                   | 1° outcome: MACE {Composite of CV death, non-fatal MI or non-fatal stroke}                      | 2° outcome: Hosp. for Heart Failure (HHF)                                                   | 2° outcomes: All-cause death CV death                                 |                                                                                                                                                                                                                                                                                                                                                                                                                                                                                                                                                                                                                                                                                                                                                                                                                                                                                                                                                                                                                                                                                                                                                |             |        |            |               |   |             |               |             |   |
| DPP4 Inhibitors                                                                                                                                                                                                                                                                                                                                                   | <b>TECOS</b> 2015<br>~ 3 yrs;<br>n= 14,671                                                                                                                                                                                                                                                                                              | Established CVD (100%);<br>12 yr hx DM; Age: 66<br>A1c=7.2%; eGFR<50 (9.4%)                              | Sitagliptin 100mg (50mg eGFR <50) po once daily vs placebo                                                                     | Mean ↓0.29% vs placebo                                                            | MACE + UA:<br>Non-inferiority for safety: P<0.001<br>Superiority for efficacy: NS               | NS                                                                                          | NS: All-cause death<br>NS: CV death                                   | <b>Cardiovascular outcome summary:</b><br>No Health Canada approval due to neutral MACE and mortality for entire class. Liu et al 2017<br>o Most data from high CV risk patients<br>o <b>CAROLINA</b> : 1 <sup>st</sup> CVOT to use an active comparator<br><b>HHF summary:</b> harm in some (i.e. saxagliptin, alogliptin); unknown mechanism.<br>Small ↑HHF (OR 1.13; 1.00-1.26) in pts who have CVD or multiple risk factors, unknown if this extends to patients without CVD. Li et al 2016 (meta-analysis)<br><b>Neutral renal outcomes:</b><br>Renal safety established, clinical renal outcomes neutral<br>o Linagliptin- 2° renal endpoint (ESRD, renal death or ↓eGFR ≥40%): <b>NS</b> <b>CARMELINA</b>                                                                                                                                                                                                                                                                                                                                                                                                                               |             |        |            |               |   |             |               |             |   |
|                                                                                                                                                                                                                                                                                                                                                                   | <b>SAVOR-TIMI 53</b> 13<br>~ 2.1 yrs;<br>n= 16,492                                                                                                                                                                                                                                                                                      | CVD (79%) or ↑CVD risk;<br>10 yr hx DM; Age: 65<br>A1c=8.0%; eGFR<50 (15.6%)                             | Saxagliptin 5mg (2.5mg eGFR <50) po once daily vs placebo<br>See <a href="#">RxFiles Trial Summary</a>                         | 7.7% vs 7.9%                                                                      | Superiority for efficacy: NS                                                                    | <b>NNH= 143/2.1yrs</b>                                                                      | NS: All-cause death<br>NS: CV death                                   |                                                                                                                                                                                                                                                                                                                                                                                                                                                                                                                                                                                                                                                                                                                                                                                                                                                                                                                                                                                                                                                                                                                                                |             |        |            |               |   |             |               |             |   |
|                                                                                                                                                                                                                                                                                                                                                                   | <b>CARMELINA</b> 2019<br>~ 2.2 yrs;<br>n= 6,979                                                                                                                                                                                                                                                                                         | CVD (57%) &/or ↑ renal risk<br>15 yr hx DM; Age: 66<br>A1c=8.0%; eGFR<60 (74%)                           | Linagliptin 5mg po once daily vs placebo                                                                                       | Not reported                                                                      | Non-inferiority for safety: P<0.001<br>Superiority for efficacy: NS                             | NS                                                                                          | NS: All-cause death<br>NS: CV death                                   |                                                                                                                                                                                                                                                                                                                                                                                                                                                                                                                                                                                                                                                                                                                                                                                                                                                                                                                                                                                                                                                                                                                                                |             |        |            |               |   |             |               |             |   |
|                                                                                                                                                                                                                                                                                                                                                                   | <b>CAROLINA</b> 2019<br>~ 6.3 yrs; n= 6,033                                                                                                                                                                                                                                                                                             | CVD (42%) or ↑CVD risk<br>6 yr hx DM; Age: 64<br>A1c=7.2%                                                | Linagliptin 5mg po once daily vs glimepiride 1-4mg daily                                                                       | No mean difference                                                                | Non-inferiority for safety: P<0.001<br>Superiority for efficacy: NS                             | NS                                                                                          | NS: All-cause death<br>NS: CV death                                   |                                                                                                                                                                                                                                                                                                                                                                                                                                                                                                                                                                                                                                                                                                                                                                                                                                                                                                                                                                                                                                                                                                                                                |             |        |            |               |   |             |               |             |   |
|                                                                                                                                                                                                                                                                                                                                                                   | <b>EXAMINE</b> 2013<br>~ 1.5 yrs<br>n= 5,380                                                                                                                                                                                                                                                                                            | Recent hosp for ACS (MI/UA)<br>7 yr hx DM; Age: 61<br>A1c=8.0%; eGFR<60 (29%)                            | Alogliptin 25mg (12.5mg eGFR <60) po once daily vs placebo                                                                     | 7.7% vs 8.1%                                                                      | Non-inferiority for safety: P<0.001<br>Superiority for efficacy: NS                             | Post hoc FDA 15<br>(HR 1.19; 0.90-1.58)                                                     | NS: All-cause death<br>NS: CV death                                   |                                                                                                                                                                                                                                                                                                                                                                                                                                                                                                                                                                                                                                                                                                                                                                                                                                                                                                                                                                                                                                                                                                                                                |             |        |            |               |   |             |               |             |   |
| SGLT2 Inhibitors                                                                                                                                                                                                                                                                                                                                                  | <b>EMPA-REG</b> 2015<br>~ 3.1 yrs;<br>n= 7,020                                                                                                                                                                                                                                                                                          | Established CVD (100%)<br>10 yr hx DM; Age: 63<br>A1c=8.0%; eGFR=74 mL/min<br>HF (10%); eGFR <60 (26%)   | Empagliflozin 10mg or 25mg po once daily vs placebo<br>*10mg same benefit as 25mg<br>See <a href="#">RxFiles Trial Summary</a> | mean ↓0.24% vs placebo                                                            | Non-inferiority for safety: P<0.001<br>Superiority for efficacy:<br>NNT = 63/3.1 yrs            | <b>NNT= 71/3.1 yrs</b>                                                                      | All cause death:<br>NNT = 39/3.1 yrs<br>CV death:<br>NNT = 46/3.1 yrs | <table border="1"> <tr> <td>HC Approval</td> <td>↓ MACE</td> <td>↓ CV Death</td> </tr> <tr> <td>Empagliflozin</td> <td>X</td> <td>✓T2DM + CVD</td> </tr> <tr> <td>Canagliflozin</td> <td>✓T2DM + CVD</td> <td>X</td> </tr> </table> <b>Cardiovascular outcome summary:</b> Zelniker et al 2019<br>Reduced MACE (HR 0.89) and CV Death (HR 0.84), effect only seen in patients with established CVD.<br>o Additional trials & head to head comparisons are needed as only 1 RCT per drug available for meta-analysis and CVD risk for patient populations at baseline variable.<br><b>HHF outcomes summary:</b><br><b>DAPA-HF:</b> beneficial 1° endpoint outcomes for HF (see left).<br>Meta-analysis suggests likely class effect (HR 0.69). Zelniker 19<br><b>Renal outcome summary:</b><br>Reduced progression of kidney disease (HR 0.55) in patients with and without established CVD. Zelniker et al 2019<br>o Less benefit in those with severe kidney disease<br><b>CREDESCENCE:</b> first RCT to study renal outcomes as 1° endpoint                                                                                                  | HC Approval | ↓ MACE | ↓ CV Death | Empagliflozin | X | ✓T2DM + CVD | Canagliflozin | ✓T2DM + CVD | X |
|                                                                                                                                                                                                                                                                                                                                                                   | HC Approval                                                                                                                                                                                                                                                                                                                             | ↓ MACE                                                                                                   | ↓ CV Death                                                                                                                     |                                                                                   |                                                                                                 |                                                                                             |                                                                       |                                                                                                                                                                                                                                                                                                                                                                                                                                                                                                                                                                                                                                                                                                                                                                                                                                                                                                                                                                                                                                                                                                                                                |             |        |            |               |   |             |               |             |   |
|                                                                                                                                                                                                                                                                                                                                                                   | Empagliflozin                                                                                                                                                                                                                                                                                                                           | X                                                                                                        | ✓T2DM + CVD                                                                                                                    |                                                                                   |                                                                                                 |                                                                                             |                                                                       |                                                                                                                                                                                                                                                                                                                                                                                                                                                                                                                                                                                                                                                                                                                                                                                                                                                                                                                                                                                                                                                                                                                                                |             |        |            |               |   |             |               |             |   |
|                                                                                                                                                                                                                                                                                                                                                                   | Canagliflozin                                                                                                                                                                                                                                                                                                                           | ✓T2DM + CVD                                                                                              | X                                                                                                                              |                                                                                   |                                                                                                 |                                                                                             |                                                                       |                                                                                                                                                                                                                                                                                                                                                                                                                                                                                                                                                                                                                                                                                                                                                                                                                                                                                                                                                                                                                                                                                                                                                |             |        |            |               |   |             |               |             |   |
|                                                                                                                                                                                                                                                                                                                                                                   | <b>CANVAS</b> 2017<br>~ 3.6 yrs<br>n= 10,142                                                                                                                                                                                                                                                                                            | CVD (66%) or ↑CVD risk<br>13.5 yr hx DM; Age: 63<br>A1c=8.2%; eGFR=77 mL/min<br>HF (14%); eGFR <60 (20%) | Canagliflozin 100mg or 300mg po once daily vs placebo                                                                          | mean ↓0.58% vs placebo                                                            | Non-inferiority for safety: P<0.001<br>Superiority for efficacy:<br>NNT = ~220/yr               | Exploratory:*<br>HR: 0.67 (0.52-0.87)                                                       | NS: All-cause death<br>NS: CV death                                   |                                                                                                                                                                                                                                                                                                                                                                                                                                                                                                                                                                                                                                                                                                                                                                                                                                                                                                                                                                                                                                                                                                                                                |             |        |            |               |   |             |               |             |   |
|                                                                                                                                                                                                                                                                                                                                                                   | <b>DECLARE-TIMI</b> 2019<br>~ 4.2 yrs<br>n= 17,160                                                                                                                                                                                                                                                                                      | CVD (41%) or ↑CVD risk<br>11 yr hx DM; Age: 64<br>A1c=8.3%; eGFR=85 mL/min<br>HF (10%); eGFR <60 (7%)    | Dapagliflozin 10mg po once daily vs placebo<br>See <a href="#">RxFiles DECLARE-TIMI Trial Summary</a>                          | mean ↓0.42% vs placebo                                                            | Co-primary outcome: MACE<br>Non-inferiority for safety: P<0.001<br>Superiority for efficacy: NS | Co-primary outcome: HHF or CV Death<br>NNT = 112/4.2 yrs<br>Exploratory:*<br>NNT=125/4.2yrs | NS: All-cause death<br>NS: CV death                                   |                                                                                                                                                                                                                                                                                                                                                                                                                                                                                                                                                                                                                                                                                                                                                                                                                                                                                                                                                                                                                                                                                                                                                |             |        |            |               |   |             |               |             |   |
|                                                                                                                                                                                                                                                                                                                                                                   | <b>CREDESCENCE</b> 2019 n=4,401; ~2.6 yrs; <b>Population:</b> CVD (50%); 15.8 yr hx DM; Age: 63; A1c=8.3%; eGFR = 56 mL/min; HF (15%); eGFR <60 (60%)<br>Canagliflozin 100mg po once daily vs placebo; 1° renal outcome (ESRD, ↑Scr & renal or CV death): <b>NNT=23/2.6 yrs</b> ; See <a href="#">RxFiles CREDESCENCE Trial Summary</a> |                                                                                                          |                                                                                                                                |                                                                                   |                                                                                                 |                                                                                             |                                                                       |                                                                                                                                                                                                                                                                                                                                                                                                                                                                                                                                                                                                                                                                                                                                                                                                                                                                                                                                                                                                                                                                                                                                                |             |        |            |               |   |             |               |             |   |
| <b>DAPA-HF</b> 2019 n=4,744; ~1.5 yrs; <b>Population:</b> NYHA Class II (67%), III (32%), IV (1%) and ↓EF ≤40%; T2DM (45%); previous HHF (47%); Age: 66; eGFR = 66mL/min<br>Dapagliflozin 10mg po once daily vs placebo; 1° outcome- worsening HF (hosp. or need for IV HF therapy) or CV death: <b>NNT=21/1.5 yr</b> ; See <a href="#">RxFiles Trial Summary</a> |                                                                                                                                                                                                                                                                                                                                         |                                                                                                          |                                                                                                                                |                                                                                   |                                                                                                 |                                                                                             |                                                                       |                                                                                                                                                                                                                                                                                                                                                                                                                                                                                                                                                                                                                                                                                                                                                                                                                                                                                                                                                                                                                                                                                                                                                |             |        |            |               |   |             |               |             |   |
| <b>VERTIS-CV</b> Estimated completion 2020 <b>Population:</b> T2DM & established CVD; Ertugliflozin 5mg or 15mg po once daily vs placebo added to usual care; 1° endpoint: MACE                                                                                                                                                                                   |                                                                                                                                                                                                                                                                                                                                         |                                                                                                          |                                                                                                                                |                                                                                   |                                                                                                 |                                                                                             |                                                                       |                                                                                                                                                                                                                                                                                                                                                                                                                                                                                                                                                                                                                                                                                                                                                                                                                                                                                                                                                                                                                                                                                                                                                |             |        |            |               |   |             |               |             |   |
| Ongoing RCTs: <b>EMPEROR-Preserved &amp; -Reduced</b> 2020 (HF ± T2DM); <b>EMPA-KIDNEY</b> 2022 (CKD ± T2DM); <b>Dapa-CKD</b> 11/20 (CKD ± T2DM)                                                                                                                                                                                                                  |                                                                                                                                                                                                                                                                                                                                         |                                                                                                          |                                                                                                                                |                                                                                   |                                                                                                 |                                                                                             |                                                                       |                                                                                                                                                                                                                                                                                                                                                                                                                                                                                                                                                                                                                                                                                                                                                                                                                                                                                                                                                                                                                                                                                                                                                |             |        |            |               |   |             |               |             |   |
| GLP1 Agonists                                                                                                                                                                                                                                                                                                                                                     | <b>EXSCEL</b> 2017<br>~ 3.2 yrs<br>n= 14,752                                                                                                                                                                                                                                                                                            | CVD (73%) or ↑CVD risk<br>12 yr hx DM; Age: 62<br>A1c=8.0%; eGFR=76 mL/min                               | Exenatide ER 2mg SC once weekly vs placebo                                                                                     | mean ↓0.53% vs placebo                                                            | Non-inferiority for safety: P<0.001<br>Superiority for efficacy: NS                             | NS                                                                                          | NS: All-cause death<br>NS: CV death                                   | <table border="1"> <tr> <td>HC Approval</td> <td>↓ MACE</td> <td>↓ CV Death</td> </tr> <tr> <td>Liraglutide</td> <td>X</td> <td>✓T2DM + CVD</td> </tr> </table> <b>Cardiovascular summary:</b><br>MACE superiority (lira-, dula- & sema-) was driven by a reduction in atherosclerotic events (MI & stroke).<br>o Most data from high CV risk patients except <b>REWIND</b><br>Reduced MACE (HR 0.88), effect only seen in patients with established CVD (HR 0.87). Zelniker et al 2019<br><b>HHF summary:</b><br>o Incretin-based NS effect on HHF.<br><b>Microvascular summary:</b> (No RCTs with this as 1° endpoint)<br>o Sema ↑ retinopathy: <b>NNH=83/2.1 yrs</b> <b>SUSTAIN-6, FOCUS</b> ongoing<br>Possible reno-protective class effect, however results exploratory (2° endpoints, short duration & minimal A1c separation):<br>o Lira- 2° renal endpoint: <b>NNT=67/3.8yrs</b> <b>LEADER</b><br>o Sema- 2° renal endpoint: <b>NNT=43/2.1 yrs</b> <b>SUSTAIN-6</b><br>o Dula- 2° microvascular (eye or renal): <b>NNT=45/5.4yrs</b> <b>REWIND</b><br>o Meta-analysis: ↓progress of kidney dx HR 0.82 (0.75-0.89) Zelniker et al 2019 | HC Approval | ↓ MACE | ↓ CV Death | Liraglutide   | X | ✓T2DM + CVD |               |             |   |
|                                                                                                                                                                                                                                                                                                                                                                   | HC Approval                                                                                                                                                                                                                                                                                                                             | ↓ MACE                                                                                                   | ↓ CV Death                                                                                                                     |                                                                                   |                                                                                                 |                                                                                             |                                                                       |                                                                                                                                                                                                                                                                                                                                                                                                                                                                                                                                                                                                                                                                                                                                                                                                                                                                                                                                                                                                                                                                                                                                                |             |        |            |               |   |             |               |             |   |
|                                                                                                                                                                                                                                                                                                                                                                   | Liraglutide                                                                                                                                                                                                                                                                                                                             | X                                                                                                        | ✓T2DM + CVD                                                                                                                    |                                                                                   |                                                                                                 |                                                                                             |                                                                       |                                                                                                                                                                                                                                                                                                                                                                                                                                                                                                                                                                                                                                                                                                                                                                                                                                                                                                                                                                                                                                                                                                                                                |             |        |            |               |   |             |               |             |   |
|                                                                                                                                                                                                                                                                                                                                                                   | <b>LEADER</b> 2016<br>~ 3.8 yrs<br>n= 9,340                                                                                                                                                                                                                                                                                             | CVD or CKD) (81%) or ↑CVD risk<br>13 yr hx DM; Age: 64<br>A1c=8.7%; eGFR<60 (23%)                        | Liraglutide 1.8mg SC once daily vs placebo<br>See <a href="#">RxFiles LEADER Trial Summary</a>                                 | mean ↓0.40% vs placebo                                                            | Non-inferiority for safety: P<0.001<br>Superiority for efficacy:<br>NNT= 53/3.8yrs              | NS                                                                                          | All cause death:<br>NNT= 72/3.8 yrs<br>CV death:<br>NNT= 77/3.8 yrs   |                                                                                                                                                                                                                                                                                                                                                                                                                                                                                                                                                                                                                                                                                                                                                                                                                                                                                                                                                                                                                                                                                                                                                |             |        |            |               |   |             |               |             |   |
|                                                                                                                                                                                                                                                                                                                                                                   | <b>REWIND</b> 2019<br>~ 5.4 yrs<br>n= 9,901                                                                                                                                                                                                                                                                                             | CVD (32%) or ↑CVD risk<br>10 yr hx DM; Age: 66<br>A1c=7.2%; eGFR=75mL/min<br>HF=8.5%; eGFR<60 (22%)      | Dulaglutide 1.5mg SC once weekly vs placebo                                                                                    | mean ↓0.60% vs placebo                                                            | Superiority for efficacy:<br>NNT= 72/5.4yrs                                                     | NS                                                                                          | NS: All-cause death<br>NS: CV death                                   |                                                                                                                                                                                                                                                                                                                                                                                                                                                                                                                                                                                                                                                                                                                                                                                                                                                                                                                                                                                                                                                                                                                                                |             |        |            |               |   |             |               |             |   |
|                                                                                                                                                                                                                                                                                                                                                                   | <b>SUSTAIN-6</b> 2016<br>~ 2.1 yrs<br>n= 3297                                                                                                                                                                                                                                                                                           | CVD or CKD(83%) or ↑CVD risk<br>14 yr hx DM; Age: 65<br>A1c=8.7%; eGFR<60 (29%)                          | Semaglutide 0.5mg or 1mg SC once weekly vs placebo                                                                             | 7.6% (0.5mg) & 7.3% (1mg) vs 8.3%                                                 | Non-inferiority for safety: P<0.001<br>Superiority for efficacy:<br>NNT= 44/2.1yrs              | NS                                                                                          | NS: All-cause death<br>NS: CV death                                   |                                                                                                                                                                                                                                                                                                                                                                                                                                                                                                                                                                                                                                                                                                                                                                                                                                                                                                                                                                                                                                                                                                                                                |             |        |            |               |   |             |               |             |   |
| <b>PIONEER-6</b> 2019<br>~ 1.3 yrs<br>n= 3183                                                                                                                                                                                                                                                                                                                     | CVD or CKD(85%) or ↑CVD risk<br>15 yr hx DM; Age: 66<br>A1c=8.2%; eGFR=74mL/min                                                                                                                                                                                                                                                         | Semaglutide 14mg po once daily vs placebo                                                                | mean ↓1.0% vs ↓0.3% placebo                                                                                                    | Non-inferiority for safety: P<0.001<br>Not powered to test superiority            | NS                                                                                              | Exploratory*:<br>All-cause death:<br>NNT= 72/1.3yrs                                         |                                                                       |                                                                                                                                                                                                                                                                                                                                                                                                                                                                                                                                                                                                                                                                                                                                                                                                                                                                                                                                                                                                                                                                                                                                                |             |        |            |               |   |             |               |             |   |
| <b>ELIXA</b> 2015<br>~ 2.1 yrs<br>n= 6068                                                                                                                                                                                                                                                                                                                         | Recent hosp for ACS (MI/UA)<br>9 yr hx DM; Age: 60<br>A1c=7.7%; eGFR=76mL/min                                                                                                                                                                                                                                                           | Lixisenatide 20mcg SC once daily vs placebo                                                              | mean ↓0.27% vs placebo                                                                                                         | MACE + UA:<br>Non-inferiority for safety: P<0.001<br>Superiority for efficacy: NS | NS                                                                                              | NS: All-cause death<br>NS: CV death                                                         |                                                                       |                                                                                                                                                                                                                                                                                                                                                                                                                                                                                                                                                                                                                                                                                                                                                                                                                                                                                                                                                                                                                                                                                                                                                |             |        |            |               |   |             |               |             |   |
| Ongoing RCTs: Exenatide mini-pump implant <b>FREEDOM CVO</b> (completed to show non-inferiority but not yet published), abiglutide (D/C) <b>HARMONY OUTCOMES</b>                                                                                                                                                                                                  |                                                                                                                                                                                                                                                                                                                                         |                                                                                                          |                                                                                                                                |                                                                                   |                                                                                                 |                                                                                             |                                                                       |                                                                                                                                                                                                                                                                                                                                                                                                                                                                                                                                                                                                                                                                                                                                                                                                                                                                                                                                                                                                                                                                                                                                                |             |        |            |               |   |             |               |             |   |
| *Exploratory 2° endpoints: 1° endpoint was not significant, therefore secondary endpoints are exploratory results only as they are not powered to test statistical significance                                                                                                                                                                                   |                                                                                                                                                                                                                                                                                                                                         |                                                                                                          |                                                                                                                                |                                                                                   |                                                                                                 |                                                                                             |                                                                       |                                                                                                                                                                                                                                                                                                                                                                                                                                                                                                                                                                                                                                                                                                                                                                                                                                                                                                                                                                                                                                                                                                                                                |             |        |            |               |   |             |               |             |   |

## References:

- Anker SD, Butler J, Filippatos GS, et al; EMPEROR-Preserved Trial Committees and Investigators. Evaluation of the effects of sodium-glucose co-transporter 2 inhibition with empagliflozin on morbidity and mortality in patients with chronic heart failure and a preserved ejection fraction: rationale for and design of the EMPEROR-Preserved Trial. (**EMPEROR-Preserved**) Eur J Heart Fail. 2019 Oct;21(10):1279-1287.
- Cannon CP, McGuire DK, Pratley R, et al; VERTIS-CV Investigators. Design and baseline characteristics of the eValuation of ERTugliflozin efficacy and Safety CardioVascular outcomes trial (**VERTIS-CV**). Am Heart J. 2018 Dec; 206:11-23.
- Cooper ME, Perkovic V, McGill JB, et al; Kidney Disease End Points in a Pooled Analysis of Individual Patient-Level Data From a Large Clinical Trials Program of the Dipeptidyl Peptidase 4 Inhibitor Linagliptin in Type 2 Diabetes. Am J Kidney Dis. 2015 Sep; 66(3):441-9.
- Gerstein HC, Colhoun HM, Dagenais GR, et al; REWIND Investigators. Dulaglutide and cardiovascular outcomes in type 2 diabetes (**REWIND**): a double-blind, randomised placebo-controlled trial. Lancet. 2019 Jul 13;394(10193):121-130.
- Green JB, Bethel MA, Armstrong PW, et al; TECOS Study Group. Effect of Sitagliptin on Cardiovascular Outcomes in Type 2 Diabetes. (**TECOS**) N Engl J Med. 2015 Jul 16;373(3):232-42.
- Hernandez AF, Green JB, Janmohamed S, et al; Harmony Outcomes committees and investigators. Albiglutide and cardiovascular outcomes in patients with type 2 diabetes and cardiovascular disease (Harmony Outcomes): a double-blind, randomised placebo-controlled trial. (**HARMONY**) Lancet. 2018 Oct 27;392(10157):1519-1529.
- Herrington WG, Preiss D, Haynes R, et al. The potential for improving cardio-renal outcomes by sodium-glucose co-transporter-2 inhibition in people with chronic kidney disease: a rationale for the EMPA-KIDNEY study. (**EMPA-KIDNEY**) Clin Kidney J. 2018 Dec;11(6):749-761.
- Holman RR, Bethel MA, Mentz RJ, et al; EXSCEL Study Group. Effects of Once-Weekly Exenatide on Cardiovascular Outcomes in Type 2 Diabetes. (**EXSCEL**) N Engl J Med. 2017 Sep 28;377(13):1228-1239.
- Husain M, Birkenfeld AL, Donsmark M, et al; PIONEER 6 Investigators. Oral Semaglutide and Cardiovascular Outcomes in Patients with Type 2 Diabetes. (**PIONEER 6**) N Engl J Med. 2019 Aug 29;381(9):841-851.
- Li L, Li S, Deng K, Liu J, Vandvik PO, Zhao P, Zhang L, Shen J, Bala MM, Sohani ZN, Wong E, Busse JW, Ebrahim S, Malaga G, Rios LP, Wang Y, Chen Q, Guyatt GH, Sun X. Dipeptidyl peptidase-4 inhibitors and risk of heart failure in type 2 diabetes: systematic review and meta-analysis of randomised and observational studies. BMJ. 2016 Feb 17.
- Liu J, Li L, Deng K, Xu C, Busse JW, Vandvik PO, Li S, Guyatt GH, Sun X. Incretin based treatments and mortality in patients with type 2 diabetes: Systematic review and meta-analysis. BMJ. 2017 Jun 8.
- Marso SP, Bain SC, Consoli A, et al. Semaglutide and Cardiovascular Outcomes in Patients with Type 2 Diabetes. (**SUSTAIN-6**) N Engl J Med. 2016 Nov 10;375(19):1834-1844.
- Marso SP, Daniels GH, Brown-Frandsen K, et al. Liraglutide and Cardiovascular Outcomes in Type 2 Diabetes. (**LEADER**) N Engl J Med. 2016 Jun 13; 375:311-322.
- McGuire DK, Alexander JH, Johansen OE, et al. Linagliptin Effects on Heart Failure and Related Outcomes in Individuals With Type 2 Diabetes Mellitus at High Cardiovascular and Renal Risk in CARMELINA. Circulation 2019; 139:351.
- McMurray JJV, Solomon SD, Inzucchi SE, et al; DAPA-HF Trial Committees and Investigators. Dapagliflozin in Patients with Heart Failure and Reduced Ejection Fraction. (**DAPA-HF**) N Engl J Med. 2019 Sep 19.
- Mosenzoni O, Leibowitz G, Bhatt DL, et al. Effect of Saxagliptin on Renal Outcomes in the SAVOR-TIMI 53 Trial. Diabetes Care. 2017 Jan;40(1):69-76.
- Neal B, Perkovic V, Mahaffey KW, et al; CANVAS Program Collaborative Group. Canagliflozin and Cardiovascular and Renal Events in Type 2 Diabetes. (**CANVAS**) N Engl J Med. 2017 Aug 17;377(7):644-657.
- Packer M, Butler J, Filippatos GS, et al; EMPEROR-Reduced Trial Committees and Investigators. Evaluation of the effect of sodium-glucose co-transporter 2 inhibition with empagliflozin on morbidity and mortality of patients with chronic heart failure and a reduced ejection fraction: rationale for and design of the EMPEROR-Reduced trial. (**EMPEROR-Reduced**) Eur J Heart Fail. 2019 Oct;21(10):1270-1278.
- Perkovic V, Jardine MJ, Neal B, et al; CREDENCE Trial Investigators. Canagliflozin and Renal Outcomes in Type 2 Diabetes and Nephropathy. (**CREDENCE**) N Engl J Med. 2019 Jun 13;380(24):2295-2306.
- Pfeffer MA, Claggett B, Diaz R, et al. Lixisenatide in Patients with Type 2 Diabetes and Acute Coronary Syndrome. (**ELIXA**) N Engl J Med. 2015 Dec 3;373(23):2247-57.
- Rosenstock J, Kahn SE, Johansen OE, et al; CAROLINA Investigators. Effect of Linagliptin vs Glimepiride on Major Adverse Cardiovascular Outcomes in Patients With Type 2 Diabetes: The **CAROLINA** Randomized Clinical Trial. JAMA. 2019 Sep 19.
- Rosenstock J, Perkovic V, Johansen OE, et al; CARMELINA Investigators. Effect of Linagliptin vs Placebo on Major Cardiovascular Events in Adults With Type 2 Diabetes and High Cardiovascular and Renal Risk: The **CARMELINA** Randomized Clinical Trial. JAMA. 2019 Jan 1; 321(1):69-79.
- Scirica BM, Bhatt DL, Braunwald E, et al; SAVOR-TIMI 53 Steering Committee and Investigators. Saxagliptin and cardiovascular outcomes in patients with type 2 diabetes mellitus. (**SAVOR-TIMI 53**) N Engl J Med. 2013 Oct 3;369(14):1317-26.
- White WB, Cannon CP, Heller SR, et al; EXAMINE Investigators. Alogliptin after acute coronary syndrome in patients with type 2 diabetes. (**EXAMINE**) N Engl J Med. 2013 Oct 3;369(14):1327-35.
- Wiviott SD, Raz I, Bonaca MP, et al; DECLARE-TIMI 58 Investigators. Dapagliflozin and Cardiovascular Outcomes in Type 2 Diabetes. (**DECLARE-TIMI 58**) N Engl J Med. 2019 Jan 24;380(4):347-357.
- Zelniker TA, Wiviott SD, Raz I, et al. Comparison of the Effects of Glucagon-Like Peptide Receptor Agonists and Sodium Glucose Cotransporter 2 Inhibitors for Prevention of Major Adverse Cardiovascular and Renal Outcomes in Type 2 Diabetes Mellitus. Circulation. 2019 Apr 23;139(17):2022-2031.
- Zelniker TA, Wiviott SD, Raz I, et al. SGLT2 inhibitors for primary and secondary prevention of cardiovascular and renal outcomes in type 2 diabetes: a systematic review and meta-analysis of cardiovascular outcome trials. Lancet. 2019 Jan 5;393(10166):31-39.
- Zinman B, Wanner C, Lachin JM, et al; EMPA-REG OUTCOME Investigators. Empagliflozin, Cardiovascular Outcomes, and Mortality in Type 2 Diabetes. (**EMPA-REG**) N Engl J Med. 2015 Nov 26;373(22):2117-28.
